# Supplementary material for: The Human Myelin Proteome and Sub-Metalloproteome Interaction Map: Relevance to Myelin-Related Neurological Diseases
Source: MDPI journal article supplement (doi:10.3390/brainsci12040434), 2022-03-24
Supplement: s1 [file s1]

## Contents of Supplementary Material

# The Human Myelin Proteome and Sub-Metalloproteome Interaction Map: Relevance to Myelin-Related Neurological Diseases

Christos T. Chasapis <sup>1,2,\*</sup>, Konstantinos Kelaidonis <sup>3</sup>, Harry Ridgway <sup>4,5</sup>,  
Vasso Apostolopoulos <sup>6,7</sup> and John M. Matsoukas <sup>3,6,8,\*</sup>

<sup>1</sup> NMR Facility, Instrumental Analysis Laboratory, School of Natural Sciences, University of Patras, 26504 Patras, Greece

<sup>2</sup> Institute of Chemical Engineering Sciences, Foundation for Research and Technology, Hellas (FORTH/ICE-HT), 26504 Patras, Greece

<sup>3</sup> NewDrug PC, Patras Science Park, 26504 Patras, Greece; k.kelaidonis@gmail.com

<sup>4</sup> Institute for Sustainable Industries and Liveable Cities, Victoria University, Melbourne, VIC 3030, Australia; ridgway@vtc.net

<sup>5</sup> AquaMem Scientific Consultants, Rodeo, NM 88056, USA

<sup>6</sup> Institute for Health and Sport, Victoria University, Melbourne, VIC 3030, Australia; vasso.apostolopoulos@vu.edu.au

<sup>7</sup> Immunology Program, Australian Institute for Musculoskeletal Science (AIMSS), Melbourne, VIC, Australia

<sup>8</sup> Department of Physiology and Pharmacology, Cumming School of Medicine, University of Calgary, Calgary, AB T2N 4N1, Canada

\* Correspondence: cchasapis@upatras.gr (C.T.C.); imats1953@gmail.com (J.M.M.)

## **1. Table S1\_PPI\_network**

**sheet "Network"**: Binary interactions of the myelin proteins with UniProt IDs

**sheet "Degree"**: Degree of connectivity for all myelin proteins involved in PPI network

**sheet "Top 10"**: The top 10 proteins in myelin PPI network that have the largest number of interactions (>24)

## **2. Table S2\_Proteomes**

**sheet "MYELIN\_PROTEOME"**: UniProt IDs, protein names, protein function, gene names of myelin proteins

**sheet "MYELIN\_METALO\_PROTEOME"**: Total metal binding proteins involved in PPI network

**sheet "Calcium\_proteome"**: Calcium binding proteins

**sheet "Cobalt\_proteome"**: Cobalt binding proteins

**sheet "Copper\_proteome"**: Copper binding proteins

**sheet "Iron\_proteome"**: Iron binding proteins

**sheet "Magnesium\_proteome"**: Magnesium binding proteins

**sheet "Manganese\_proteome"**: Manganese binding proteins

**sheet "2Fe-2S\_proteome"**: 2Fe-2S binding proteins

**sheet "3Fe-4S\_proteome"**: 3Fe-4S binding proteins

**sheet "4Fe-4S\_proteome"**: 4Fe-4S binding proteins

**sheet "Iron\_sulfur\_proteome"**: Iron\_sulfur binding proteins

**sheet "Zinc\_proteome"**: Zinc binding proteins
