# Supplementary material for: The Human Myelin Proteome and Sub-Metalloproteome Interaction Map: Relevance to Myelin-Related Neurological Diseases
Source: Brain Sci. 2022 Mar 24;12(4):434. doi: 10.3390/brainsci12040434 (PMC9029312; doi:10.3390/brainsci12040434)
Supplement: Supplementary file 1 [file brainsci-12-00434-s001.zip › Table S1_PPI_network.xlsx]

## Sheet: Network
A	B
P20339	Q9Y371
P17252	P29966
Q13439	P10909
P0DP25	P01116
P50502	P11142
P0DP24	P01116
P09874	P54652
P14625	P10909
O00429	O00429
Q9BSJ8	Q9BSJ8
Q02978	Q02978
Q14203	Q9H0E2
P07196	P21281
Q13153	P17600
P12036	P10809
Q16623	P60201
Q9BSJ8	Q8TC12
P51149	O60493
O60861	O60861
P05771	P08238
Q14974	P35222
P51149	P45880
Q9Y371	P27338
P10636	P0DMV8
Q13813	P05771
Q01484	Q01082
P10636	P0DMV9
O15145	O15144
Q9NQ66	P50148
P05771	Q92686
Q9NQ66	Q9NQ66
P43304	P04075
P09496	Q9Y371
Q93050	P07195
Q9HB71	P19086
Q9Y224	Q9Y224
Q9BY11	Q9BY11
P45880	P19367
P00492	P00492
Q13885	P04075
P02787	P04350
P02545	P02545
P04075	P04075
P02794	P02794
Q16891	Q9NX63
P07195	P07195
P05771	P30086
Q14203	Q96FW1
Q15555	O75122
P09417	P09417
P40926	P40926
O75190	O75190
Q14203	P0DPH7
P31946	Q13813
P11216	P11216
Q9Y617	P36957
P0DP25	Q13555
P0DP23	Q13555
P27348	Q00610
Q9NZN3	Q9BY11
Q9Y371	O75964
P27348	P17987
P07196	Q7L576
P14136	P14136
P17600	P49418
Q15019	Q16181
P63104	P17252
P17600	O00499
O60831	O60831
P12956	P63104
P27348	P23526
O15126	Q9Y371
P27348	P14618
P0CG48	P02794
P10636	P10636
P27348	P60174
O60831	P27824
P27348	O00764
P36957	Q02978
P27348	P06733
Q13509	P16949
P61224	P36957
P19086	P19086
P27348	P04406
P27348	P00558
P21283	P21283
Q13555	Q96SI9
P27348	P00338
P23526	P23526
P13611	P13611
P27348	P49327
Q9UPY8	Q15555
P27348	P17858
P49418	O43426
O43236	Q16143
P27348	P40939
P27361	P51452
P09417	P01116
P31930	P01116
P04156	P11021
P51572	P51572
P31946	P05129
P28482	P51452
P08238	P10909
P27348	P23528
P07900	P10909
Q15019	Q15019
P27348	P07737
P50570	P22392
O94856	O94856
P36957	P09471
P27348	P07355
P40123	P40123
P22314	P22314
P49418	Q05193
P27348	Q16658
Q9UJ70	Q9Y371
P05129	Q92686
P52306	P01112
P49418	P50570
P28482	P07339
Q9UQ16	P49418
P28482	P04406
P27348	Q14204
O75396	Q12846
O00499	O00401
Q9NZ45	Q9NZ45
O75190	Q9Y5J5
P27348	P62906
P61981	P61981
P05129	P30086
P14923	P52565
P27348	P05388
P43155	Q9HB71
P09874	P12956
O43681	O43681
Q9NVA2	Q15019
P09874	P09874
P04075	P09972
P22392	P62745
P04271	Q92597
P02511	P40926
P02511	P02768
Q12765	P10636
P30048	P30048
Q9BQE3	Q9Y371
O15173	Q9Y342
P62745	O43175
Q8TB36	Q9Y3D6
P27361	P10636
O00499	Q92930
P10114	P02792
Q92752	P23471
P23634	Q08209
P52565	P62745
Q12846	Q12846
P27348	P52597
P35222	O43707
P61981	P04350
Q16181	Q9UHD8
Q13303	Q13303
P10636	Q9UPY8
O60831	P62745
P27348	P51572
P16615	P16615
Q15019	Q9UHD8
Q13554	Q13554
P49418	Q08209
Q16623	Q9BQE5
P27348	Q04837
P28482	P10636
P62745	P78559
Q16181	Q99719
Q13557	Q13557
Q13561	Q13561
Q14194	Q14194
Q04917	Q9Y2J0
P06396	P27338
Q92752	P13611
Q9HB71	P04271
P60201	P60201
Q15388	P0CG48
P08238	P08238
P45974	P22314
P62714	P10636
Q9Y281	Q14204
Q99963	O00401
Q16181	Q9Y371
P35222	P17252
P31946	P61981
P99999	P08574
P31946	P27348
Q9H115	P61266
Q96FW1	P0CG47
Q99832	P36542
P45974	P0CG47
Q9Y371	P49418
P68871	P68871
P24752	P24752
P08754	P08754
P40925	P40925
P32004	P35241
P53396	P22392
P62714	P30153
P07196	P07196
Q96FN4	P35241
P0DP24	Q13561
P04156	P04156
P0DP23	Q13561
P20336	P20336
P49006	Q13561
Q16181	Q16181
P50570	P02792
Q7Z4W1	Q7Z4W1
P0DP25	Q13561
O95292	Q9P0L0
P32119	P63104
O94811	P04406
P06241	P14927
O95292	O95292
P52565	P26038
Q9Y281	P23528
P50570	P06241
P10515	P10515
Q14141	Q99719
Q9BY11	O60861
P61981	Q13885
P35611	P17252
P31946	Q13885
Q15019	Q99719
P02794	Q9BY11
P49418	Q00610
P55072	P15104
P0CG48	O75955
Q01082	Q9BY11
P20340	Q13439
P62879	P04899
P06241	P06241
P62879	P63096
P28482	P30041
P06241	P99999
P0CG48	Q15366
P20338	Q12846
P23471	P23471
P43004	P43004
P07900	Q13153
P00441	P29692
P04156	P10636
P29692	P46821
Q13153	Q13153
P49069	O00264
Q13153	P61981
P0CG48	P61088
Q13153	P63104
P27824	P02787
Q15334	P35580
P10114	P10114
Q12846	Q5T5C0
Q16623	Q5T5C0
P04156	P02511
Q00610	O94973
Q00610	O75146
P09496	P55072
O00401	P06396
Q92930	P11233
Q9NQ66	Q01082
P29966	P0DP23
P0CG48	P53618
P55290	P55290
P12814	Q9UQM7
P29966	P0DP25
P29966	P0DP24
P35611	Q13153
Q12931	P27361
Q14203	P10636
P04156	O75323
P50570	Q8WXF7
P07900	P17987
Q12931	P28482
P14618	Q9UJ70
P40926	P28331
P0CG48	P62191
P43003	P43003
P07900	P04899
P0CG48	P55072
P07900	P14618
P0CG48	P62195
P04156	P31939
Q96FW1	P61088
P27361	P08237
P61106	P07355
Q96FW1	Q96FW1
P15313	O75190
P07900	P78527
P50570	Q15286
P07900	P04075
P0CG48	P60900
P04179	P14625
P07900	P40925
P07900	P04406
P11177	P10515
P07900	P00558
P07900	P00338
P22392	P22392
Q13554	Q9UQM7
Q14344	Q9HB71
P35222	Q08722
P14618	Q08722
Q99719	Q99719
P08238	P35232
P32004	P15311
P07900	Q9Y617
Q01082	Q13813
P0CG48	P49418
P07900	P12814
P06396	Q53GQ0
P07900	P22314
P0CG48	O00499
P35232	P42658
Q13409	Q13409
P07900	P35579
O43237	Q14203
P07900	Q13813
P08238	Q9C040
Q96FW1	O75190
P07900	P13639
Q00610	Q00610
P0CG48	Q9H0E2
P52565	Q13153
P50570	Q96FZ7
Q99828	O00401
P15104	P15104
P60033	Q969P0
P12532	P12532
P07900	P05388
P60900	P28066
P07339	P69905
Q9P0L0	P05090
O75955	Q14254
P50570	Q96FW1
P61981	P10809
P28482	Q13153
Q16555	Q16555
P61981	Q14204
P63000	Q00610
O94973	P05023
Q9H0E2	P63000
Q9P0L0	Q9P0L0
P63000	P35579
P63000	P52306
P06396	Q8WUD1
Q9BY11	P50570
P61981	P11142
O43681	O00264
Q96KP4	Q96KP4
P61981	P78371
O95219	O00499
P0CG48	P63000
Q02750	P30086
Q9BY11	P0DMV9
Q9BY11	P0DMV8
P29401	P29401
P35222	Q13526
Q9Y3D6	P0CG48
Q9NQC3	Q9NQC3
P30086	P28482
P62807	P62807
Q9BY11	P11142
P09471	Q13561
Q12846	P54920
P61981	Q01082
P48426	P10909
P55072	P30153
Q01813	Q01813
P06241	P13591
P01112	P06241
P32004	P13591
P61981	Q00325
Q9Y2A7	P63000
P04271	P10636
P61981	Q00610
Q9UH03	Q9UH03
P04843	P0CG48
Q14203	P47756
P01112	O43301
P35222	P09496
Q13561	P47756
P35080	P36957
O15173	O00264
O00499	P50570
P01112	P51148
Q13561	P42025
P32119	P32119
P30084	P30084
P01116	P01116
Q9Y2A7	Q7L576
P78527	P02686
P42658	P42658
P17252	P02545
Q9Y2J0	P20336
P15313	Q9UI12
Q13740	Q13740
P0CG48	P10909
P0DP25	P10636
P78527	Q10567
Q8WZ42	Q8WZ42
P15313	P21926
Q08722	P78324
P0DP23	P10636
Q12931	P60842
P29692	P14625
P05026	O95865
P15313	P07339
Q12931	P11021
O00154	Q13554
P01112	P20339
Q12931	P04406
P15313	Q9H444
Q12931	P39019
P10909	P10809
P15313	Q14254
P15313	O75955
P08195	Q99623
P10909	P04156
P15313	P02794
P04843	P11021
P02794	Q9H0E2
P09874	P35232
P15313	O94832
P49069	P04843
P09874	P62241
P25705	P36542
P60033	P60033
P10909	P11021
P30086	P30086
P00441	P11142
P09874	Q9H4B7
Q14558	Q14558
P17252	P0DMV9
P02545	P35222
Q13153	P63000
P15313	P11234
P09874	P25705
P20339	P51148
P17542	P17542
P15313	Q15286
P15313	Q14108
Q9HB71	P28482
Q9P0L0	P55072
P17252	P10636
P15313	Q86Y82
Q9UQ16	Q9UQ16
P10636	P02649
P62807	P22392
O43681	P0CG48
O95292	P55072
P05771	P10636
O95292	O43681
P12814	P11216
P05129	P10636
O95292	P0CG48
P10636	P31946
O43426	Q99963
P31689	O95433
P60201	P27824
P28482	P12036
P15313	P38606
P49418	P10636
P15313	P36543
P15313	Q9Y5K8
Q9HB71	P22392
P23528	P05023
Q8WUM4	Q99963
P15313	P21281
Q8IXJ6	P62805
P21796	P51572
P15313	P21283
Q9NVA2	Q9Y371
Q9NVA2	Q16181
Q96S97	P60201
P47985	P08574
O75083	P23528
Q92597	Q16799
P00403	P51572
Q9NR31	Q15836
P19367	P19367
P19367	P21796
P52945	P52945
Q00610	Q10567
Q9H4G0	P27348
P08238	P11142
Q13526	P10636
P15531	Q9Y3F4
Q9H4G0	P63104
P29692	P45880
P15531	P22392
Q9Y3F4	Q9Y3F4
P29692	P62191
P0CG48	P09936
P17600	Q13813
P06576	Q9Y3D6
P12956	P18669
Q99963	Q99963
P07737	O00401
O95433	P11142
P35580	P61981
O43491	Q13813
P00441	P02511
P02794	P02792
P0DP23	P21579
P49368	P11142
P0DP25	P21579
P0DP24	P21579
O00264	P22392
P28482	P28482
P11142	P0CG48
P50395	P51149
P05129	P14136
Q8WZ42	P02511
P13591	P05771
Q16623	O75396
P32004	P32004
O15126	O15126
P68366	P04899
P04632	P62879
P36969	P30041
Q01082	Q9Y2J2
Q16623	P46459
P06576	P25705
Q9Y3Q8	P10909
P59998	Q9BPX5
Q9P0L0	P23763
Q13509	P02787
P04075	P02511
Q14203	P02511
P63104	Q9Y6K8
P15311	P26038
Q01082	Q14203
Q9P0L0	P63027
O95197	O95197
P39019	P62241
Q13813	P07196
P35222	P09874
Q99523	Q99523
P21579	P21579
P11142	P47756
P78527	Q99828
P14923	P07900
O75190	Q8IXJ6
Q04917	Q04917
P62714	P35580
P51572	P23763
P20340	Q14203
P02511	P14136
O43491	P61981
P49419	P49419
P69905	P02042
P01112	P61224
P68871	P69905
P00558	P04406
Q02750	P31946
P51149	P50570
P04406	P04406
Q04917	P27348
Q15019	Q16623
Q04917	P61981
P61088	P61088
P07900	P05771
Q9H444	Q9H444
P68371	P36957
Q9UQM7	P27348
Q96FW1	P10636
P06576	Q13526
P62745	P63000
Q99719	Q16623
Q9H444	Q96FZ7
P14625	P17252
O15173	Q9P0L0
P31689	P11142
Q12955	Q9GZQ8
O95865	Q13526
P51149	P61018
Q9GZQ8	P35222
P10644	P12956
Q9UQM7	Q13555
P51149	P20338
P51149	P20340
Q13153	P62805
P51149	P61020
Q13153	Q99828
P35579	P35580
P61266	P23763
Q16623	O43752
P51149	P20339
Q01484	Q9GZQ8
P51659	P51659
P14618	Q13526
Q05193	Q05193
P02511	P35222
P21926	P17252
P16403	P78527
P32004	P27824
P27361	P16949
P35080	P35080
P00505	P40926
O75828	Q15286
P20339	P50395
Q12846	Q86Y82
P69905	P02511
P04156	Q9Y3Q8
P07900	P07900
P16403	P09874
Q7L576	P61981
P16403	P35222
P61266	P63027
Q15388	P21796
P30038	P30038
P06241	P30519
P30101	P10909
Q08722	P63092
P0CG48	Q96FW1
P16403	Q14974
Q08722	P50148
P63104	P23528
P29966	P12956
Q14204	Q14204
P09874	P78527
Q14204	O43237
P31946	P0DMV8
Q14204	Q14203
P31946	P0DMV9
Q9NQC3	O95197
Q9NR31	Q96DZ9
P63000	Q7L576
P62195	P62195
P50502	P22392
P27348	P0DMV8
P15311	P17252
P27348	P0DMV9
P25686	P62979
P07900	P61088
O95219	Q9Y371
Q9H444	Q8WUM4
P55087	P55087
P29966	P27824
P11021	P16949
P21926	Q969P0
P07900	Q9C040
P05771	P07355
P17252	P07355
O95433	P29692
P29966	P30101
P21926	P60033
P60174	P60174
P78527	P61981
P29966	P49773
P29692	P0DP24
Q9H9B4	Q9Y5J5
P00387	P23763
P99999	P11142
Q13596	Q13596
P01112	P27338
P29966	P52565
O95219	O95219
Q13409	O43237
P27361	Q05469
Q13409	Q14204
Q9NY65	P17987
Q99963	P06241
P28482	Q05469
P01112	P10809
Q14194	Q9NQC3
P27361	P17542
Q14008	Q14008
Q12860	P24821
Q8WXF7	Q8WXF7
P39019	P39019
Q9BY11	O00401
P50570	O95782
P09874	P13489
Q9BY11	O43426
P13591	P13591
P04908	P0CG48
P02545	P05090
P02511	P02511
P02545	P08133
P02545	P27449
P61981	P06576
P20648	Q00610
P05141	P35232
O95433	P12956
P09455	Q8IXJ6
Q13555	Q13557
P52565	P63000
O95433	P78527
P50148	P50148
P20648	P51148
P61160	P59998
P20648	P61026
P00338	P00338
Q13526	P0CG47
Q9Y4I1	P0DP23
P10636	P10909
P01112	Q53GQ0
Q9Y4I1	P0DP24
P07195	P00338
P02545	P60033
P10909	O00499
Q9Y4I1	P0DP25
P09936	P08133
P10636	O95433
P02545	Q14108
P20338	P20339
P20648	O75396
Q9P035	P20020
P0DP23	P11234
P20648	O15400
P09936	P49411
P0DP25	P11233
P20648	Q86Y82
P0DP23	P11233
P20648	P38606
P09936	P11021
P20648	P54920
Q14141	Q15019
Q9P035	P16615
P61981	P0DMV8
P16152	P16152
P0DP25	P11234
P61981	P0DMV9
P09936	P11216
P20648	P63027
P20648	Q15836
Q14204	P22392
P06396	P21796
P20648	Q99536
Q9UQ16	Q9HB71
P20648	P23763
O15145	O00401
P27361	P02686
Q14194	Q99832
Q12846	P21579
P54920	P63027
P17252	P29692
P12532	P21796
P04179	Q12765
P02545	P30519
P20648	P07355
P63027	Q12846
P20648	P08133
P20648	P51572
P53816	P01112
Q16623	O95292
Q12860	Q12860
P35241	P52565
Q16623	P15313
P60201	Q12846
O00499	P12956
Q9UI12	P36543
P63027	Q15836
P07900	Q92597
P20648	P07099
Q92597	P27824
Q12846	O95292
P0CG47	P10636
P12956	Q92597
P36542	P06576
P35222	Q92597
Q99719	Q12846
P20648	P50148
Q9NZN3	Q9NZN3
P04792	P40926
P50395	P20338
P20338	P31150
P17252	P52597
P20648	P20648
Q99832	P61224
P31930	P99999
P20648	P63096
P12036	P07196
P20648	P04899
P53396	Q8IXJ6
P61224	O95865
P12036	P07197
P02545	P60201
Q14194	P29692
P35222	P49773
P02545	P04156
Q9Y696	P08238
P07900	P17252
P61224	P11177
P14618	P61224
Q9UQM7	P13637
P10644	Q01082
Q96FW1	P22314
P13639	P13639
P10644	Q9H444
P02545	Q16799
Q04917	O43491
P63027	O95292
P23763	O95292
P20648	P05026
P02545	Q12846
P20648	P55011
P62195	P55072
P20648	Q14108
P09936	P13591
O43761	P17252
P61981	Q9Y2J2
P20648	P05023
P08237	Q01813
P61088	P22392
P62805	P17252
P02545	P23763
P02545	P63027
P51572	P35580
P55786	P10636
Q92930	P35222
Q12846	P23763
P07339	P10636
Q92599	Q15019
P35232	P45880
Q92930	P14923
O94826	P07900
P02545	O15400
P35232	P02545
Q05193	P22392
P14136	P07196
Q9Y2J2	P27348
P78559	P46821
O94811	P45880
P35232	P63104
P35232	Q15149
Q01518	P40123
P55084	P40939
O43681	P63027
O43752	O15400
P31946	P78527
P02545	O43759
P23284	P49069
P10636	Q9BY11
Q86Y82	P54920
P04792	P08758
Q9Y2J2	P31946
P30153	Q99623
Q8TC12	Q8TC12
P17252	Q14141
P02545	O75396
Q13885	P10636
P04792	P04792
P02545	Q15836
P63104	Q9BY11
P22695	P31930
Q9Y2J2	P63104
P52565	P52565
P02545	O43752
P06241	P06733
P63104	P25705
P48643	P45880
P02686	P60201
P06241	P0DPH7
P63104	P06733
O75083	P35222
P0DP24	Q96PE5
P0DP23	Q96PE5
Q13526	P12956
Q16623	Q86Y82
Q14558	P28482
P15531	P15531
P02545	O95197
P11142	P55072
O15400	P54920
P01024	P01024
P07900	P55072
P0DP25	Q96PE5
O43491	P31946
P0DP24	P61088
Q14203	O15020
Q9Y3D6	O00429
Q13526	O95782
P29218	P29218
P0DP23	P62241
P63104	P0DMV8
P35232	P07355
P63104	P0DMV9
P0DP25	P62241
P0DP24	P62241
Q13526	P40939
P35232	P12814
P02545	O00154
P04792	P15313
P02545	Q15555
Q00765	P61020
P0DP23	P63092
P48426	P63000
P20916	P02686
P05771	Q9UQM7
P04792	P45880
P17252	Q99623
P0DP24	P63092
Q9UF11	P52306
P0DP25	P63092
Q9GZQ8	O75323
P02545	Q86Y82
P00492	P08758
P02545	Q9BQE5
P61026	P10809
Q9GZQ8	P40939
P62879	Q15365
P04792	P62979
P04792	P08195
Q14204	P29692
P27361	P28482
P0CG48	P53396
Q99832	P29692
O43837	Q9Y5J5
Q9NQC3	P02686
P63000	Q14974
Q8IXJ6	O43175
P04156	P09543
P29692	O00401
P10644	Q9GZQ8
P0CG48	P11021
P0DP25	P35241
P0DP24	P35241
P0DP23	P35241
P0CG48	P16152
P60201	P20916
P0CG48	O75828
P63000	P63000
Q13561	P00441
P02545	Q9Y342
P02545	Q9Y3A5
P0CG48	P0DPH7
P00492	P06744
Q9H0U4	P31150
P02545	Q9H0Q3
Q9UI12	Q9Y5J5
P00338	P11142
P55011	P55011
P02787	P01024
P04156	Q8WXF7
Q9Y281	Q9Y281
P61160	O00401
Q9Y281	P40123
P0DP23	P49418
Q13439	Q16799
P00492	P61088
P0DP24	P49418
P04406	Q13554
P27348	P62805
P62805	P09874
P0DP23	O00499
P0DP25	O94760
P27348	P62807
P0DP24	O00499
P0DP24	O94760
P0DP23	O94760
Q16799	P10909
Q08209	P60900
P0DP25	O00499
Q9Y371	O00499
Q9UH03	Q14141
P0CG48	O95782
Q16799	P60900
P20339	P02787
P0CG48	O94973
Q8WZ42	P35579
P0DP25	P49418
P59998	O15145
O43426	O00499
O00499	O95782
P00441	P63000
P0CG48	Q8WUM4
P02511	O00154
P27348	P23396
Q02750	P28482
Q14203	Q13561
P0DP24	P11233
P27348	P25705
P49411	P35579
Q9UDT6	O75122
P11234	P0DP24
O00401	P59998
P07196	Q9Y4I1
P08758	P61088
P27348	P16403
Q13554	Q13557
P08758	P48735
P28482	P05023
P27348	P0DP24
P07900	O95433
P27348	P0DP23
P17252	P05023
Q14141	Q9UHD8
Q15388	Q9GZQ8
P27348	Q8WZ42
P02545	Q9NQC3
P10636	P0DP24
P27348	P0DP25
P0CG48	P23396
P27361	P05023
P10636	Q13509
P27348	P02545
P31939	P22392
Q9C040	Q9Y4I1
P10636	P11021
P51572	Q9Y3D6
P10636	P31689
P63092	P63092
Q86VP6	Q86VP6
P10644	P10644
P27348	P35579
P10636	P07900
P10636	P61981
Q96DZ9	Q9P2R7
P05771	Q00610
P06744	P61088
P0DP24	Q9UQM7
Q9UPR5	P27348
P02686	P28482
O00499	P13639
P10636	P68366
P06744	P48735
Q13439	Q13439
Q9UPR5	P63104
P17542	Q04837
Q9UPR5	P31946
P0CG48	Q14254
P31946	Q9P0K1
Q9P0K1	P27348
P04792	Q9BUF5
Q8IXJ6	P68366
P27348	Q13885
Q9P0K1	Q04917
P06744	P08758
P30153	Q14738
P17542	P12956
P09496	Q00610
Q13813	P17677
P05771	P17677
Q01518	Q01518
P0DP23	Q00688
O75489	Q16718
P23528	Q01518
P04216	P04216
Q01082	Q01082
P61981	P52597
P17542	P09874
O60861	P05388
Q16795	P28331
P43004	P10636
P04792	Q9Y3Q8
P0DP25	Q00688
Q9Y696	P63104
O60861	P04406
P0DP24	Q00688
P27348	P06576
P27348	P78527
P07355	P10636
P08133	P10636
P06396	P35080
Q14204	Q99623
Q14203	Q13409
P53396	P60842
O60861	Q7L576
P0CG48	Q14764
Q01082	Q92599
P27348	Q9BQE3
Q01082	P53618
P53396	P11142
P53396	P23396
P01116	P35232
P53396	Q13509
P08195	Q9Y5J5
P09936	P35222
Q9Y2A7	O60861
Q9Y3Q8	Q13526
P20338	Q13526
P16949	Q15019
P04792	Q9UF11
O00264	P51572
P61981	Q16718
P78527	P78527
Q93050	O95219
Q99832	P50570
Q9Y3F4	P22392
P63096	P09471
Q99963	Q92599
P02511	P04792
P30041	P30041
P50570	Q05193
P0CG48	O75947
Q12846	P20339
P04792	Q96FW1
P32119	P30048
Q14764	Q14764
Q9Y371	Q9Y371
Q9Y5J5	Q9Y5J5
P0CG48	Q15149
P63027	P51572
P49418	P49418
Q99828	P61981
P50213	O43837
O94832	Q9Y5J5
Q16555	Q14194
P63104	P0DP24
Q16555	O14531
Q15836	P51572
P52306	P01116
P60900	P62191
Q96FW1	P35222
P36957	Q13885
P02545	Q96S97
Q12846	Q15334
P61981	Q15836
P78559	P68366
P63000	P68366
Q12846	P46459
O43761	P61981
P61981	P62805
P07355	P07355
P68366	P17987
P17252	P08133
P55011	P15311
P02545	Q96DZ9
P21796	P68366
Q9NR31	P30519
Q8WZ42	P40227
P07900	Q14194
P07900	P14868
P06241	Q14254
Q16623	Q15836
P06241	Q00610
P10636	P06241
Q9NQC3	P68366
P50991	P78371
P61981	P68366
P63104	P22392
P01112	P11233
Q92930	P68366
P61981	Q14141
P61981	Q9NPJ3
P68366	Q99426
P0DP25	P12532
P0DP24	P12532
P62805	P63104
P0DP23	P12532
P0DP25	P46100
P78559	Q13885
P35222	P07900
P61981	Q9NX63
P0DP24	P46100
P0DP23	P46100
Q13557	Q9UQM7
P52597	P63104
Q15365	P63104
P04908	P62805
Q92930	Q13885
P63000	P0DP24
Q9GZQ8	Q99623
Q9NPJ3	Q9NPJ3
Q7L576	Q7L576
Q9GZQ8	P0DMV8
P0CG48	Q15555
P63104	P23396
P17252	P0CG48
P63104	P05388
Q96JE9	Q13885
Q99623	P35232
P38646	P10809
P63104	P62081
Q9NR31	O15400
P26038	P26038
P00441	P00441
P02768	P02649
P07339	P02686
P13639	P63104
P02768	P02768
P07339	P60201
O75190	Q8WZ42
P63104	P35579
P30153	P11142
P63104	P61981
P63104	Q14204
P63104	Q13885
Q13555	Q13555
P30153	P23396
P09874	P62807
P30153	P07355
P14625	P14625
Q9H4B7	P63104
P53816	P30153
P0DMV9	Q16143
P30153	P62241
P50990	P40227
P02545	P63104
P0DMV8	Q16143
P04792	P50395
P0DP24	Q13557
P0DP25	P04271
P0DP24	P04271
P63104	P07355
P0DP24	Q13554
P0DP23	P04271
P0DP24	Q13555
P38646	P14625
Q9UEY8	P04792
P04792	O43491
Q15555	Q9Y5J5
P63104	Q16658
P07737	P63104
P52597	P04792
P12956	P36543
P63104	Q01813
Q05193	P15531
P30101	P61088
Q05193	O00499
P30101	Q12931
P30084	P63104
P30101	P48735
P30101	P08758
P63104	P49327
Q04917	P04792
P78357	P06241
P17252	Q9HB71
P49327	P49327
P30101	P06744
P02794	Q15365
P02794	Q15366
P63104	P04406
P32119	Q16555
P38606	P38606
P04792	P62191
P12532	P63104
P27348	P04792
P49454	P49454
P04792	P11021
P00338	P63104
P07195	P63104
P0CG48	P35232
Q9Y3D6	Q9Y3D6
P04792	P08238
Q9P0K1	P63104
P29218	P04271
P63104	P06576
P16152	P22392
O75077	P63104
P62191	P62195
P06241	Q9NQC3
P14618	P63104
P23526	P63104
P01112	Q02750
P0CG48	P12956
P29401	P63104
P63104	P04075
P06241	O94856
P63104	O00764
P01112	P01112
P63104	P60174
P50990	P63104
P40227	P63104
P15311	P15311
P45974	P49411
O94973	O94973
P78371	P63104
P49368	P63104
P17987	P63104
P18669	Q14203
P01112	O00401
P0DP24	Q16891
P63104	Q99832
Q9H4M9	O95782
P55072	P60900
P06241	P04406
O95433	P08238
P04075	P06733
P0DP23	Q16891
P02649	P32119
P63104	P10809
P11021	P63104
P63104	P07900
O60641	O94973
Q14194	P04406
P63104	P08238
P35222	P04406
P0DP25	Q16891
P63104	P04792
Q14764	Q13554
Q9H4M9	Q00610
Q9UQM7	P04406
Q12931	P63104
P14618	P28482
P51149	Q8WXF7
P61266	O95292
P46459	P54920
P46459	P46459
Q02750	Q13526
P06733	P08238
P63104	Q14974
Q16891	P48643
P04792	O94826
P46459	Q99747
P07900	P49327
P06733	P11142
O43707	P15313
P31150	P28331
P04792	P12814
Q9Y2J2	P06241
P04792	O43707
Q9UQM7	P62195
Q12846	Q9H115
P49755	P49755
P04792	P19105
Q9UDY2	P04792
P04792	P10636
P14136	P06241
P17987	Q99832
P14136	P35222
P35580	P35580
P06733	Q8WZ42
P04075	P13929
P14136	P21281
P32004	Q01484
P55072	P63104
Q14203	P13929
P0DP24	P14136
Q9Y224	P63104
P46821	Q9Y3F4
P06241	Q14008
P13929	P13929
Q9P0L0	P46459
P04792	P14927
P06241	O60493
P09874	O43236
P0DP25	P50579
P0DP24	P50579
P04792	Q9H4G0
P10636	P12235
P10636	Q15388
Q92823	Q01484
P0DP23	P50579
P14618	P13929
P28482	P09211
P61088	P0CG47
Q9Y4I1	Q9Y2J0
Q9Y4I1	P20336
P78527	P63104
Q8WZ42	P13929
P23396	P07900
Q9P035	O95292
P00505	P04406
Q9P035	Q9P0L0
P35241	P15311
P60900	P04792
P63104	O43813
P0DP23	P35611
P23284	P50570
P0DP25	P35611
P0DP24	P35611
Q15836	Q12846
P63104	P31150
P53618	P12956
Q9UQ16	P06241
P05023	P35611
P27348	P61981
P17600	P17600
P12956	P10909
A0MZ66	P61981
P63104	Q86VP6
P62805	P48741
Q9UQM7	P07900
P39019	P22392
P63104	P22314
P17252	P0DMV8
P07900	P04792
P63104	P51572
O00499	Q9H444
Q14764	Q9H0E2
P02649	P22061
P12956	Q00610
P10636	P63104
P31946	P04792
Q10567	Q96PY5
P31946	Q9H4G0
P04792	P02794
P63104	P62906
O15394	O15394
P23471	P35222
O00499	O00499
P16403	P62805
Q13554	P31946
Q7L0J3	P06241
Q9UQM7	P31946
P17252	P20020
P52945	P12956
P63104	P60842
O43236	P0CG48
P62987	P62805
P78527	P52945
P49773	P49773
P29692	P29692
P09874	P0DMV8
P09874	P0DMV9
P63027	P21579
P63104	P28066
P15311	P63104
Q13813	P63104
P35222	P15311
Q01082	P63104
P0CG48	P22314
P12956	P78527
P63104	O43707
P68366	P06241
Q16891	Q16891
P18669	P63104
Q96PY5	P10909
P19367	P09104
P63104	P00558
P50502	P02649
P68366	P09104
P10636	P0CG48
P08133	P04271
O75955	P06241
P0DMV8	P50502
P0DMV9	P50502
Q15365	P02545
Q16623	P54920
Q14974	Q14974
Q16623	Q12846
P01116	P62714
P10909	P10909
P63104	P50991
P38646	P63104
O94826	P0DMV8
O94826	P0DMV9
Q15555	Q15555
P11142	P63104
Q9NQ66	P29992
Q12860	P06241
Q9NQC3	P54920
Q13555	Q13554
P14136	Q96FW1
P04792	Q9Y2J2
P31939	P31939
P22061	P22061
O94856	Q92823
Q8TB36	P05090
P14625	Q9HB71
Q15836	O43752
P04792	P54920
Q9H4M9	P04792
P53618	P53618
Q92823	Q92823
P30084	P22314
P45880	P99999
Q14194	P02794
Q9Y3I0	P63104
P02792	P02792
Q15366	Q15366
P09936	P0CG47
Q01484	P35222
Q14764	P63104
P49368	P12956
P63104	Q9BSJ8
P62249	P22392
P21579	P30519
Q12860	P23471
P63104	Q00610
Q16891	Q9Y5J5
O15173	Q9H9B4
Q12846	P61266
Q02246	Q12860
P20339	P14136
Q02246	P32004
Q02246	Q92823
P05129	P35222
Q9UQM7	P20339
P17252	P14136
P20339	P20339
P14618	P35222
P23528	P60174
O75190	P11142
P53396	P53396
P28482	Q8WZ42
Q16658	P35222
P63000	Q15286
P0DP23	P20020
P12814	P12814
P09211	P09211
P04271	P14136
P0DP24	P20020
Q9BX67	Q9BX67
P09874	O00499
P0DP25	P20020
P78371	P13639
P08574	P08574
Q7Z3B1	Q7Z3B1
P27824	O00264
Q9UJ70	Q9UJ70
P27824	P51572
P78371	P14625
Q13449	Q7Z3B1
P04792	Q01082
P78371	P23396
P00387	P99999
Q13449	Q13449
Q9NR31	Q9Y342
P50579	P27361
Q8NFX7	Q12846
Q9Y2A7	P61981
Q5JU85	P0DP23
Q8NFX7	Q16623
Q9NQC3	Q8WXF7
P78371	P55072
P78371	O94905
P78371	P08238
O43491	P63104
P78371	P07900
P27361	Q9NQ66
P27338	P27338
Q9P121	Q9P121
P10809	P10809
Q9P121	Q7Z3B1
Q15366	Q15365
P27361	P14618
P78324	Q9C040
Q9Y3Q8	Q15365
O00499	P14618
Q16851	Q15365
Q9P121	Q13449
P17252	P17252
P14868	P10909
P28482	P01116
Q14344	P35241
P36957	P10909
Q02750	P27361
P21579	Q9H115
Q16836	Q16836
P00367	P00505
P50570	P50570
P02649	P02649
P23528	P61981
P0CG47	P11142
Q13813	O15020
P14621	P14621
P35222	P06241
P11177	P11177
P05129	P61981
P49069	P14625
P78357	Q09470
Q9NQC3	P78357
P17252	P61981
P61088	P22314
P17987	P78371
P17987	P48643
Q9Y281	P60981
P00367	P00367
Q9NQC3	Q09470
Q13555	P16949
P05771	P61981
P49069	O43681
P11142	P11142
P63000	P50579
P04792	P11233
Q99963	Q9UQ16
O43707	O43707
P11142	P09496
P02545	P09874
P0DP24	P02686
Q99963	P52565
O43759	Q13596
Q9H115	Q16623
P35222	P11142
P13716	P13716
Q13423	Q14764
P35222	P0DMV9
P35579	P04271
Q16623	O15400
P35222	P0DMV8
P35579	P35579
P35222	P07195
P35222	P08238
P59998	P35080
P25686	P62987
O75146	O75146
O15173	O43681
P25686	P11142
P02686	Q13153
P25686	P60900
P25686	P0CG48
P30519	P06576
Q16623	Q16623
P30519	Q16891
P07339	Q93050
Q15388	O94826
Q02750	P02686
P15313	Q93050
P07196	P07197
O75363	O75363
Q9H0E2	Q9H0E2
Q09470	Q9BQE5
O94925	O94925
P00387	P00387
Q92597	P61981
Q14203	P42025
P11142	P16949
P55072	P55072
P0DMV9	P11142
P0DMV8	P11142
Q9HB71	Q9HB71
Q8WXF7	P02545
P15311	P52565
Q9GZQ8	Q15836
O15173	P02787
Q16623	P63027
P12956	P12956
Q9GZQ8	O43752
Q9GZQ8	Q86Y82
Q12860	Q92752
Q92752	Q92752
P04792	P99999
Q12955	Q15149
P04156	P27348
O94856	Q92752
O43761	Q9Y371
P14136	Q8WUM4
P10909	P12814
Q9GZQ8	P63027
Q01484	Q9NZN3
Q01484	Q9H4M9
P61088	P59998
P62879	P11177
P61088	P30084
P04156	P10809
P17600	P35080
P61088	P48735
Q08722	Q9P1W8
P49418	O00499
P10909	P69905
P04156	P07900
P49418	O95782
P49418	Q10567
P08238	P10636
P09874	P0CG48
Q05193	P35080
O75955	P10606
P50570	P07737
P02768	Q16891
P49418	O94973
P04156	P42658
Q96DZ9	Q9Y371
O75077	P04156
P26038	P51572
P09936	P07900
P17252	Q16658
P09936	P11142
Q9Y2J2	Q04917
P17252	P16403
P17252	P02686
O15394	P04156
Q05193	P04156
Q14194	P19404
Q13449	P04156
Q16653	P04156
P20916	P06241
P04216	P06241
P04179	P04179
Q12860	P04156
Q9UHD8	P61026
Q14982	P04156
O15173	Q9H0Q3
P0CG48	P0CG48
P48426	P20338
Q8NHG7	P55072
Q9P035	P63000
Q9GZQ8	P0CG48
P0CG48	P45974
Q8NHG7	P27824
Q9Y371	Q13596
P63000	Q5JU85
P36543	P09972
P06396	O43707
P21796	P99999
P36543	P04075
O00499	O94973
P63000	P17252
O00499	Q00610
P27361	P27361
Q00610	O60641
P27361	P09874
P09874	P28482
P04271	P04271
P60900	Q9GZQ8
Q16623	P23763
Q08209	Q08209
O00401	P08238
P63096	P63096
P05771	P02686
Q9Y371	O43426
O00401	P07900
P06241	P14923
P31689	P31689
P51149	P51149
Q9Y3F4	P78371
P99999	P61088
P14923	P35222
P51149	Q00765
P01116	Q99832
Q9Y371	P09211
Q12860	P32004
P07900	P08238
P63104	P63104
P14618	P14618
P05026	P05023
Q14203	Q14203
Q9Y371	Q8WZ42
P26038	P32004
P07900	P11142
Q9Y3F4	Q99832
Q9NVA2	Q99719
Q08722	P63096
P07900	P30153
P12814	Q8WZ42
Q99719	Q92599
O43707	Q9UQM7
P07900	Q9HB71
Q14194	P07737
P51149	P38606
P60201	Q99536
P07900	P0DMV8
P07900	P0DMV9
P62191	P62191
Q8TAM6	P35222
P05771	P29966
O43707	Q13554
P51149	Q9BSJ8
Q15149	P26038
P07900	P50502
P09874	Q16891
P09496	O75146
P62979	P62979
Q13153	Q02750
P0CG47	P0CG47
Q9GZQ8	P35611
P28066	P28066
P00387	P69905
P09471	P09471
P35080	Q99719
Q8WUM4	Q8WUM4
Q9H4M9	Q9H4M9
P12814	Q969P0
Q9H4M9	Q9NZN3
P12814	P60033
P24821	P00558
Q9GZQ8	P09496
P62987	P62987
P24821	P07355
Q9UQM7	P10636
P30041	P09211
Q10567	P84085
P24821	P10909
P49748	P49748
O94811	O94811
P10644	P63104
Q92599	P04271
Q9Y617	Q9Y617
Q04837	Q04837
P08238	Q9UQM7
Q9NQC3	P22392
P04156	P02649
P26038	P60033
P04271	P63000
P26038	Q969P0
P22695	Q9NQC3
P31930	Q9NQC3
P08238	Q13554
O60641	Q10567
Q13557	P08238
Q8IXJ6	P52565
Q13596	O95197
Q13596	Q96DZ9
P30101	P30101
P00918	P10809
P0DMV8	P04271
P20338	P50213
P08238	Q13555
Q13596	Q9NQC3
Q9UHD8	Q9NVA2
O43426	Q08209
P28482	Q9NQ66
P17858	P17858
P59998	O15144
P55072	P62191
Q9UQM7	P04271
P17858	P08237
P55072	P63027
P27824	P04271
P08237	P08237
P55072	P09471
O00499	P10636
P20338	P27361
Q9GZQ8	P55072
O43426	P09496
O43426	Q00610
Q00765	Q13596
O95782	O43426
P31946	P31946
P62879	P62805
P27361	P30048
P62879	O43707
P27361	Q16836
P27361	P49327
P27361	P21796
Q92597	P20338
P05141	P12532
P27361	P06576
P04156	P21281
Q92686	P0DP25
P28482	P04908
Q92686	P0DP24
P27361	P62805
Q16851	Q16851
O15400	Q12846
Q92686	P0DP23
P27361	P04908
P04406	O95292
O94856	P78357
P60900	P60900
P62879	P00441
P28482	P21796
P06241	P07900
P05771	P05771
P11021	P11021
P28482	P62805
O43707	Q8WZ42
P09488	P09488
P02794	P10909
P49411	Q96DZ9
P04156	P32004
P04156	P20916
P52565	Q6IBS0
P78324	P11021
P01857	P01857
P22061	P28331
P78324	P40227
P04156	P13591
P78324	P08238
Q99719	O43236
P11021	P14136
P0CG47	P00441
P78324	P11142
Q8WZ42	P0DMV8
P46821	P35232
Q8WZ42	P0DMV9
O43236	O43236
P48735	P48735
P78324	P14625
P78324	P38646
Q92599	O43236
Q92599	Q92599
P19404	P35222
P22392	P30153
P78324	P0DMV8
P19404	P06241
P78324	P0DMV9
P0DMV8	P0DMV9
P0DMV9	P0DMV9
P08238	P17252
P19404	P0DP24
O43175	Q8WZ42
P08238	P05129
P78324	P62241
Q12931	P61088
Q15006	P14625
Q8WZ42	P0DP24
P17252	Q01814
P27348	P27348
P0DMV8	P0DMV8
Q12931	P48735
P02511	Q14194
P20916	P46821
Q92614	Q92614
Q15149	Q13813
Q99963	Q05193
Q99523	P02787
Q12931	P08758
Q96FW1	P00441
P21579	Q16623
Q16851	Q8WZ42
P01112	P01116
Q08209	P00441
Q12931	P30084
P15531	P63000
Q12931	P06744
Q9Y696	Q05193
Q14204	Q9Y5J5
O94973	Q05193
O43837	Q15286
P0DP24	P0DP24
P06744	P06744
P0DP23	P0DP25
P01834	P01857
P0DP24	P0DP25
P78324	P12814
P0DP23	P0DP23
P04179	P20338
Q9UQM7	Q9UQM7
Q8IZH2	Q9Y6C9
P0DP23	P0DP24
P49755	P53618
P78324	P18085
P78324	P07737
P07900	P01024
P04406	P00441
Q9Y3I0	Q9Y224
P0DP25	P0DP25
Q9NQW6	Q16181
Q9UPY8	Q9UPY8
P09622	P09622
Q9Y371	P50570
Q16623	P60033
P32004	O95782
P38606	P49411
Q9UPY8	Q13561
P07900	P02787
Q02750	Q02750
Q13813	P26038
P00441	P0CG48
Q16555	O95782
P50579	P28482
P78324	P47756
P00441	P62191
P17600	P27361
P78324	P60033
P06241	P08238
P78324	P02794
Q99963	O14531
Q9HB71	P35222
Q8IZH2	P21912
P19404	Q8WXF7
P78324	P60900
P78324	P62195
P07900	P02649
Q13561	Q9UQM7
P05090	P05090
O60282	P61981
Q9Y2J0	Q86VP6
O43752	Q12846
P01857	P0CG04
P08754	P62879
P0DMV8	P31689
O43752	Q9H115
P07339	P45880
P07900	P06396
P0DMV9	P31689
Q14344	P35222
Q9BY11	Q05193
Q15365	P22392
Q08257	Q08257
P31150	P51149
P28482	P07900
P0DMV8	P62195
P31150	P20340
Q14195	Q14194
P0DMV9	P62195
P0DP24	P07900
P0DP23	P07900
Q16555	Q14195
Q14203	Q9UQM7
P19404	Q96FW1
P55072	Q14194
P14625	P23284
P17252	Q9UEY8
P0DP25	P07900
Q92823	O43301
Q10567	Q10567
P0DMV8	O75190
P02042	P02042
P0DMV9	O75190
P02649	P07197
P31946	P35232
P17252	P51674
P35222	P63104
P17252	Q92686
P17252	Q05193
Q15365	Q13153
P17677	P0DP23
P27824	P30101
P22392	P20339
P27824	P38646
Q16555	Q13885
Q8WZ42	P0DP23
P17677	P0DP25
Q8WZ42	P0DP25
P17677	P0DP24
P00505	P11142
P49591	P49591
P06241	Q8WUM4
[truncated: 18 more rows]

## Sheet: Degree 
Uniprot ID	Degree
P63104	46
P27348	43
P07900	41
P0CG48	35
P02545	32
P04792	29
P0DP24	29
P17252	28
P0DP23	26
P20648	24
P0DP25	24
P61981	22
P10636	22
P27361	20
P15313	19
P78324	18
P06241	18
P28482	18
P04156	18
P35222	18
Q16623	17
P09874	17
Q9GZQ8	13
P01112	13
P31946	13
P05771	13
P51149	13
Q14203	13
P63000	12
Q12931	12
Q12846	12
O00499	12
Q9UQM7	11
P50570	11
P49418	11
P08238	11
Q8WZ42	10
Q9Y371	10
P09936	9
Q9NQC3	9
P55072	9
P14618	9
Q9BY11	9
P0DMV8	9
P11142	9
P78371	8
Q99963	8
Q14194	8
P02511	8
P12956	8
Q96FW1	8
Q01082	8
Q13153	8
P29966	8
Q12860	7
P30101	7
Q02750	7
P35232	7
P78527	7
P61088	7
P29692	7
P00441	7
P62879	7
P53396	7
P32004	7
O15173	7
Q14204	7
P14136	7
P02794	7
P0DMV9	7
P10909	7
P10644	6
Q9NR31	6
Q16555	6
P12814	6
P20338	6
Q9P0L0	6
P30153	6
P06396	6
Q04917	6
P52565	6
P07339	6
Q05193	6
P05129	6
P27824	6
Q9HB71	6
P04075	6
Q13813	6
P17600	6
P07196	6
P20339	6
P19404	5
Q9H4M9	5
Q9P035	5
Q9Y4I1	5
P25686	5
P16403	5
P63027	5
Q9Y2J2	5
P68366	5
O95433	5
Q13526	5
P15311	5
Q08722	5
P60900	5
P26038	5
O95292	5
Q9Y281	5
Q13561	5
Q99719	5
O43707	5
Q92930	5
P04271	5
O00401	5
O43426	5
Q15019	5
Q00610	5
Q13555	5
O75190	5
Q01484	5
P60201	5
P14625	5
Q14764	4
P06744	4
Q15365	4
Q92599	4
Q13596	4
P00387	4
P59998	4
P21579	4
O43491	4
Q9Y3F4	4
P15531	4
P62805	4
Q8IXJ6	4
P02649	4
P17542	4
Q9Y2A7	4
P04179	4
P49069	4
P32119	4
Q99832	4
P0CG47	4
Q15388	4
Q13554	4
Q92597	4
Q9NVA2	4
O43681	4
Q9UQ16	4
O94856	4
P22392	4
P23528	4
P51572	4
P11021	4
P00338	4
P04406	4
Q16181	4
P17987	4
P36957	4
Q16891	4
P00492	4
P09496	4
Q9NQ66	4
O60861	4
P01116	4
Q16851	3
Q9P121	3
Q13449	3
Q02246	3
P62987	3
Q92823	3
P38646	3
P17677	3
Q9P0K1	3
Q9UPR5	3
P20916	3
O94826	3
O43761	3
Q9Y696	3
P31150	3
P24821	3
P00505	3
O43752	3
Q9Y3Q8	3
P46459	3
P49368	3
P06576	3
Q15836	3
P21796	3
P31689	3
P39019	3
Q9H444	3
P21926	3
Q10567	3
P02686	3
P30084	3
P35080	3
P48426	3
O95219	3
P69905	3
P12532	3
P35579	3
Q13409	3
Q14344	3
O94973	3
O75955	3
Q14141	3
O94811	3
P61266	3
P99999	3
P62714	3
P45974	3
Q13557	3
P78559	3
Q08209	3
P23471	3
Q92752	3
Q9Y3D6	3
P02768	3
P62745	3
P14923	3
P31930	3
O43236	3
Q9UPY8	3
P61224	3
P06733	3
O60831	3
Q15555	3
P19367	3
P07195	3
Q92686	3
P12036	3
P50502	3
Q13439	3
Q8IZH2	2
P01857	2
Q8NHG7	2
P00367	2
Q8NFX7	2
Q9Y3I0	2
O15394	2
P22061	2
A0MZ66	2
P50579	2
P49755	2
O60641	2
O75077	2
P78357	2
P50990	2
P04216	2
O43837	2
Q00765	2
P29218	2
P48643	2
P22695	2
P08758	2
P23284	2
Q01518	2
Q15149	2
P55011	2
P53816	2
P16152	2
P49411	2
O15400	2
P61160	2
P05141	2
P08133	2
P04908	2
Q96DZ9	2
P30519	2
Q12955	2
Q99523	2
P50395	2
P18669	2
Q9H4G0	2
P52945	2
Q16799	2
O75083	2
Q8WUM4	2
P36543	2
P38606	2
Q14558	2
P08195	2
P05026	2
Q9UI12	2
P04843	2
Q9UH03	2
P13591	2
P62807	2
P29401	2
P60033	2
Q99828	2
P13639	2
P11177	2
P08237	2
P31939	2
P62195	2
P62191	2
Q8WXF7	2
P53618	2
P35580	2
O00264	2
P46821	2
P43004	2
Q15366	2
P30041	2
P63096	2
P20340	2
P35611	2
P35241	2
P08754	2
P68871	2
Q9H115	2
Q9Y2J0	2
Q9UHD8	2
P52597	2
P10114	2
Q8TB36	2
P52306	2
Q9UJ70	2
P07355	2
P09471	2
P07737	2
P17858	2
Q13509	2
O15126	2
P23526	2
Q7L576	2
Q9NZN3	2
Q9Y617	2
P40926	2
P09417	2
P30086	2
P02787	2
Q13885	2
Q9Y224	2
Q93050	2
O15145	2
P45880	2
Q14974	2
Q9H0E2	2
Q9BSJ8	2
P49591	1
Q14195	1
Q08257	1
O60282	1
P09622	1
Q9NQW6	1
P01834	1
Q92614	1
Q15006	1
P09488	1
P00918	1
P49748	1
Q8TAM6	1
Q14982	1
Q16653	1
O94925	1
O75363	1
Q13423	1
P13716	1
Q09470	1
P14621	1
Q16836	1
Q5JU85	1
Q7Z3B1	1
Q9BX67	1
P62249	1
Q7L0J3	1
Q96PY5	1
P09211	1
P13929	1
Q9UDY2	1
P49454	1
Q9UEY8	1
Q96JE9	1
Q99426	1
Q9NPJ3	1
P50991	1
P14868	1
P40227	1
P50213	1
Q16795	1
O75489	1
Q86VP6	1
P48735	1
Q9UDT6	1
P23396	1
Q9H0U4	1
Q9UF11	1
P01024	1
O43759	1
P55084	1
P55786	1
P61026	1
P09455	1
O95782	1
Q14008	1
Q9NY65	1
Q9H9B4	1
P49773	1
P55087	1
P62979	1
P63092	1
P30038	1
O75828	1
P51659	1
P68371	1
P02042	1
P49419	1
O95197	1
P23763	1
P36969	1
P04632	1
P00403	1
P47985	1
Q96S97	1
Q86Y82	1
P11234	1
Q9H4B7	1
P25705	1
O94832	1
Q99623	1
O00154	1
O95865	1
Q13740	1
Q01813	1
P54920	1
Q96KP4	1
P05023	1
P05090	1
P28066	1
Q9C040	1
O43237	1
P42658	1
P61106	1
P43003	1
P55290	1
O75146	1
Q15334	1
P15104	1
P10515	1
Q7Z4W1	1
P49006	1
P20336	1
Q96FN4	1
P40925	1
P24752	1
P36542	1
P08574	1
Q04837	1
P16615	1
Q13303	1
P23634	1
P02792	1
O43175	1
Q9BQE3	1
P30048	1
Q12765	1
P43155	1
Q9Y5J5	1
Q9NZ45	1
O75396	1
Q16658	1
P22314	1
P40123	1
P49327	1
P13611	1
P21283	1
P00558	1
P16949	1
P60174	1
P11216	1
P19086	1
P43304	1
P50148	1
P27338	1
Q8TC12	1
P10809	1
Q02978	1
O00429	1
P51674	0
P0CG04	0
P21912	0
P18085	0
Q9Y6C9	0
Q01814	0
Q6IBS0	0
P84085	0
P10606	0
Q9P1W8	0
P60981	0
O94905	0
P29992	0
P09104	0
P48741	0
O43813	0
P12235	0
P19105	0
Q99747	0
P62081	0
P46100	0
O14531	0
O75947	0
Q16718	0
Q00688	0
Q14738	0
Q9BUF5	0
Q9P2R7	0
O94760	0
Q9H0Q3	0
Q9Y3A5	0
P09543	0
O15020	0
Q96PE5	0
P13637	0
P07197	0
P07099	0
Q99536	0
P20020	0
P27449	0
P13489	0
Q05469	0
P61020	0
P61018	0
Q9Y6K8	0
Q9BPX5	0
Q9Y5K8	0
Q14108	0
P62241	0
P60842	0
P42025	0
P51148	0
O43301	0
P47756	0
Q00325	0
Q8WUD1	0
Q14254	0
Q969P0	0
Q96FZ7	0
Q53GQ0	0
Q15286	0
P28331	0
O75323	0
P11233	0
Q5T5C0	0
P04899	0
P14927	0
Q9BQE5	0
Q9Y342	0
P09972	0
P05388	0
P62906	0
P51452	0
P40939	0
Q16143	0
Q96SI9	0
O00764	0
O75964	0
P0DPH7	0
O75122	0
Q9NX63	0
P04350	0
O15144	0
O60493	0
P21281	0
P54652	0

## Sheet: Top10
Entry	Gene names	Protein names	Degree
P63104	YWHAZ	14-3-3 protein zeta/delta (Protein kinase C inhibitor protein 1) (KCIP-1)	46
P27348	YWHAQ	14-3-3 protein theta (14-3-3 protein T-cell) (14-3-3 protein tau) (Protein HS1)	43
P07900	HSP90AA1	Heat shock protein HSP 90-alpha	41
P0CG48	UBC	Polyubiquitin-C	35
P02545	LMNA	Prelamin-A/C	32
P04792	HSPB1	Heat shock protein beta-1 (HspB1)	29
P0DP24	CALM2	Calmodulin-2	29
P17252	PRKCA	Protein kinase C alpha type (PKC-A)	28
P0DP23	CALM1	Calmodulin-1	26
P20648	ATP4A	Potassium-transporting ATPase alpha chain 1	24
